# Supplementary material for: The Influence of Satellite-Derived Environmental and Oceanographic Parameters on Marine Turtle Time at Surface in the Gulf of Mexico
Source: MDPI journal article supplement (doi:10.3390/rs14184534), 2022-09-11
Supplement: s1 [file s1]

## Supplementary materials

Title: The influence of satellite-derived environmental and oceanographic parameters on marine turtle time-at-surface in the Gulf of Mexico

Authors: Kelsey E. Roberts, Lance P. Garrison, Joel Ortega-Ortiz, Chuanmin Hu, Yingjun Zhang, Christopher R. Sasso, Margaret Lamont and Kristen M. Hart

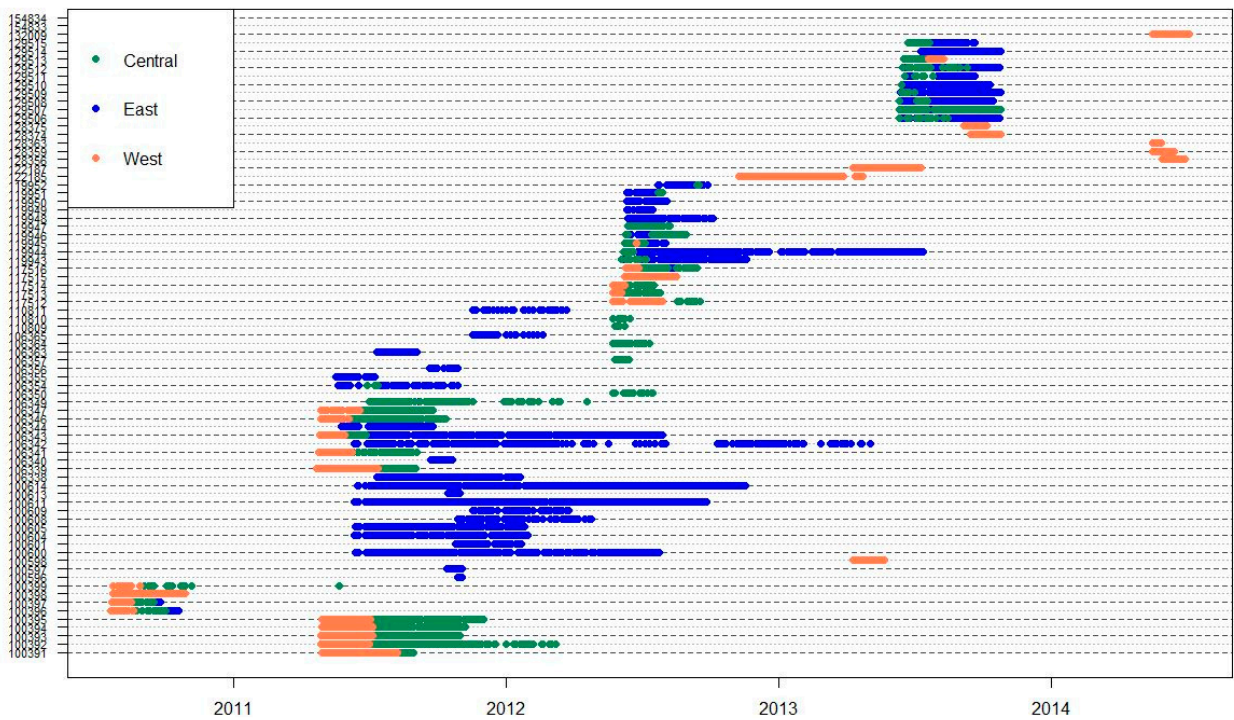

Figure S1. Tracking duration of all marine turtles included in the analysis from mid-2010 until January of 2016. Colors represent region of the Gulf of Mexico as defined by Bureau of Ocean Energy Management (BOEM).

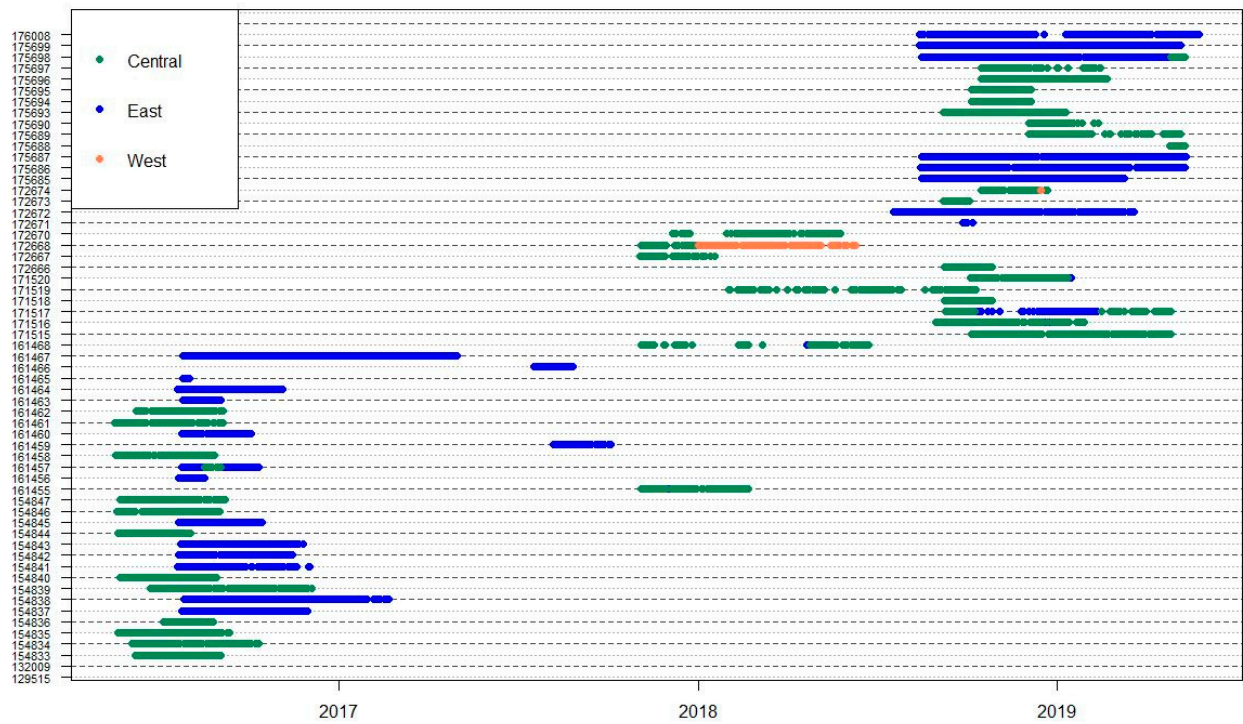

Figure S2. Tracking duration of all marine turtles included in the analysis from January 2016 until mid-2019. Colors represent region of the Gulf of Mexico as defined by Bureau of Ocean Energy Management (BOEM).

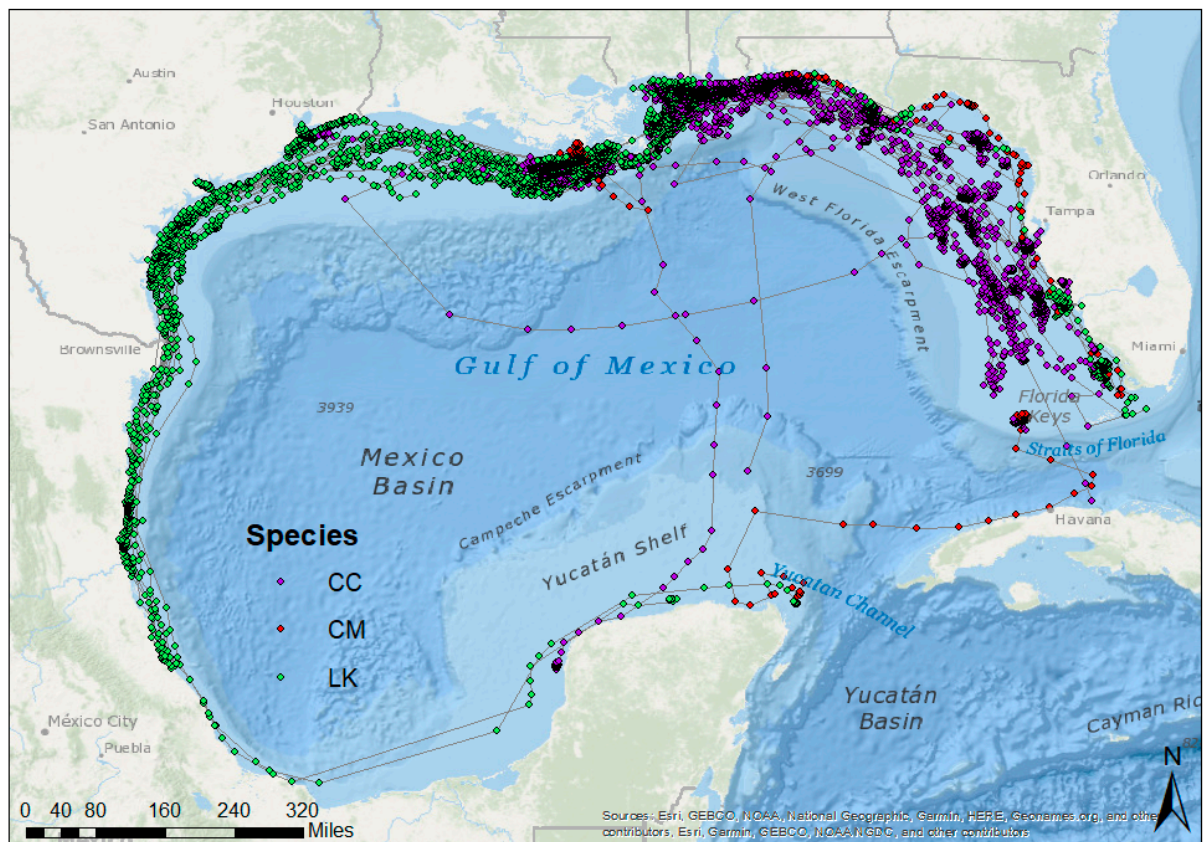

Figure S3. Resulting tracks from state space model for all marine turtles included in the analysis separated by species.

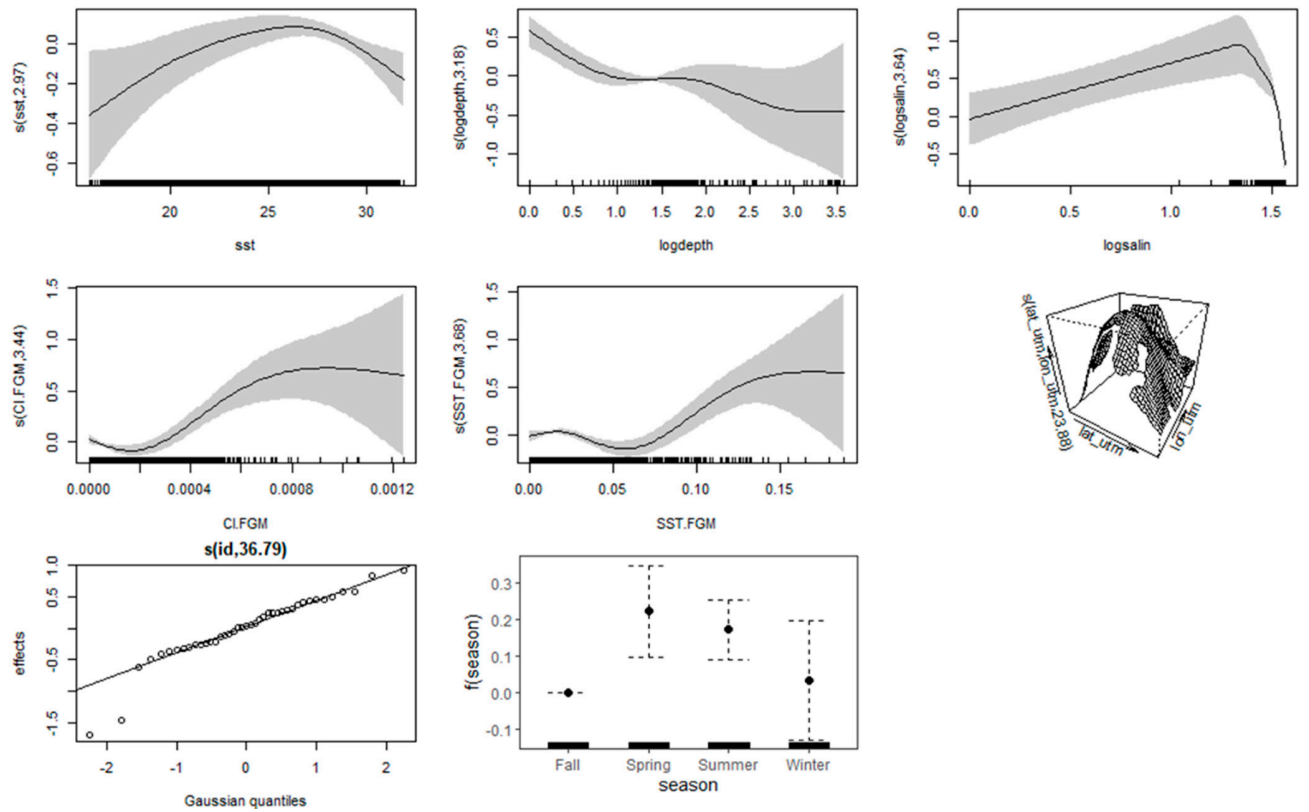

Figure S4. Generalized additive model (GAM) plots of loggerhead turtle (*Caretta caretta*) time-at-surface (scaled between 0 and 1) in the Gulf of Mexico relative to environmental and factor variables. Shaded areas for environmental variable plots represent standard error.

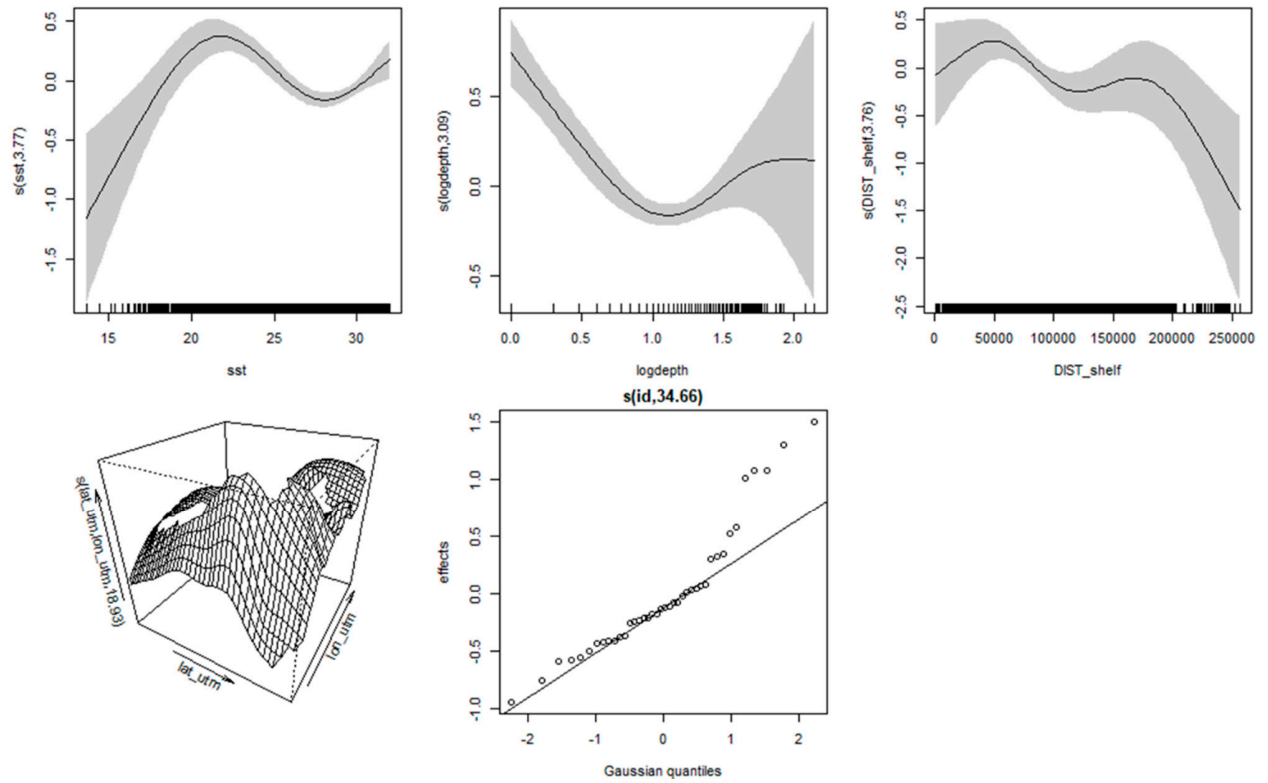

Figure S5. Generalized additive model (GAM) plots of Kemp's ridley turtle (*Lepidochelys kempii*) time-at-surface (scaled between 0 and 1) in the Gulf of Mexico relative to environmental and factor variables. Shaded areas for environmental variable plots represent standard error.

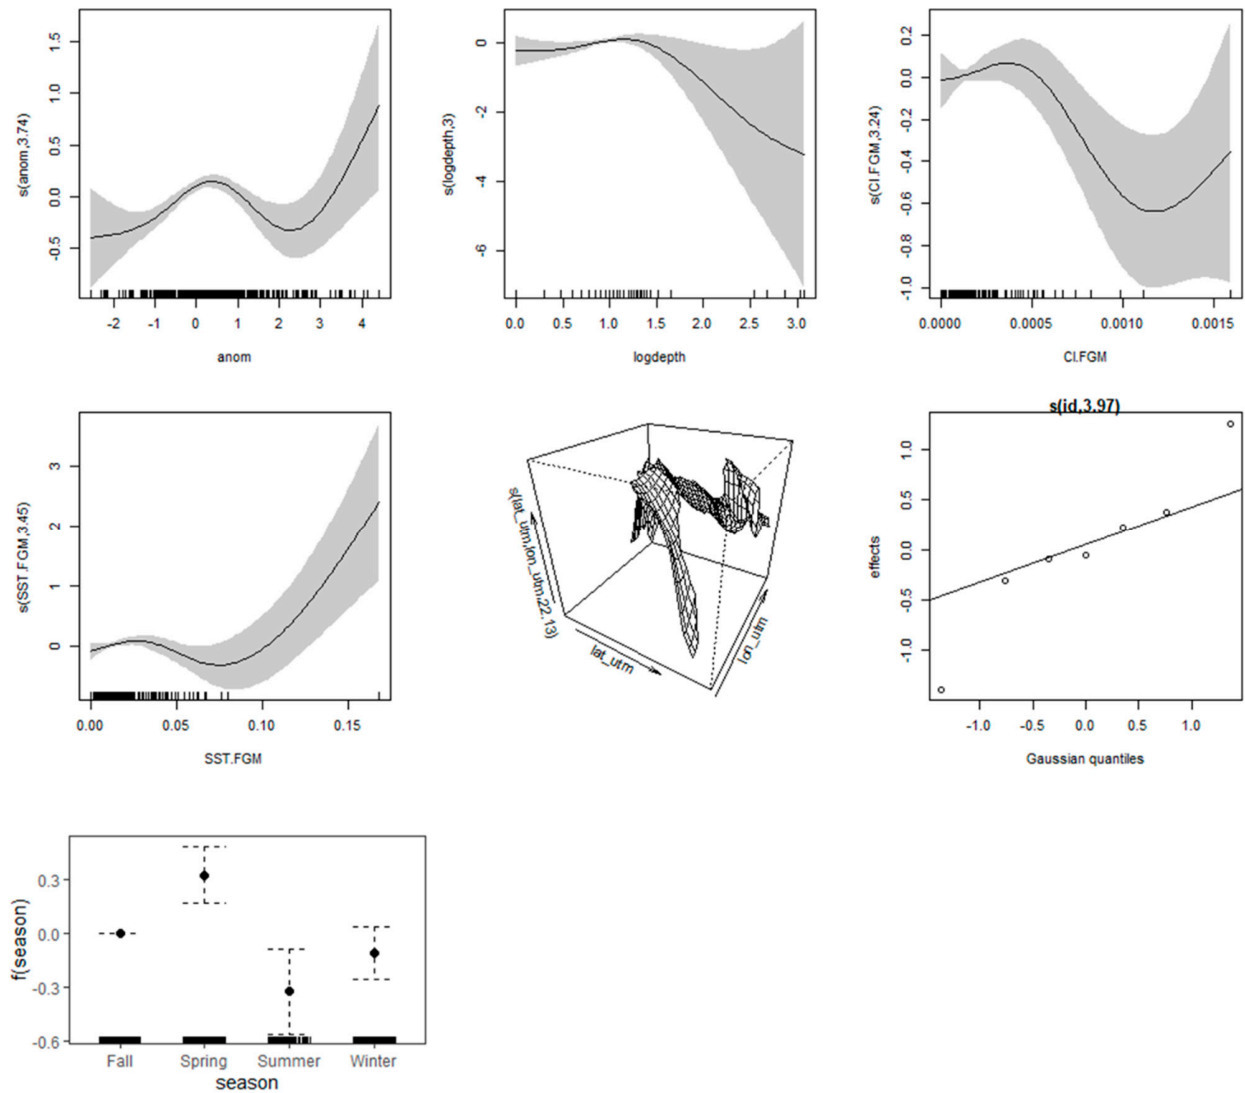

Figure S6. Generalized additive model (GAM) plots of green turtle (*Chelonia mydas*) time-at-surface (scaled between 0 and 1) in the Gulf of Mexico relative to environmental and factor variables. Shaded areas for environmental variable plots represent standard error.

## GAM Summaries

### **Loggerhead turtles:**

Family: Beta regression(6.69)

Link function: logit

Formula:

ptop2T ~ season + s(sst, k = 5) + s(logdepth, k = 5) + s(logsalin,  
k = 5) + s(CI.FGM, k = 5) + s(SST.FGM, k = 5) + s(lat\_utm,  
lon\_utm) + s(id, bs = "re")

Parametric coefficients:

|              | Estimate | Std. Error | z value | Pr(> z )                    |
|--------------|----------|------------|---------|-----------------------------|
| (Intercept)  | -1.88475 | 0.08981    | -20.985 | < 2 × 10 <sup>-16</sup> *** |
| seasonSpring | 0.22250  | 0.06392    | 3.481   | 0.0005 ***                  |
| seasonSummer | 0.17210  | 0.04108    | 4.190   | 2.79 × 10 <sup>-5</sup> *** |
| seasonWinter | 0.03343  | 0.08296    | 0.403   | 0.6870                      |

---  
Signif. codes: 0 '\*\*\*' 0.001 '\*\*' 0.01 '\*' 0.05 '.' 0.1 ' ' 1

Approximate significance of smooth terms:

|                    | edf    | Ref.df | Chi.sq | p-value                     |
|--------------------|--------|--------|--------|-----------------------------|
| s(sst)             | 2.967  | 3.485  | 17.00  | 0.00119 **                  |
| s(logdepth)        | 3.179  | 3.605  | 30.89  | 1.70 × 10 <sup>-6</sup> *** |
| s(logsalin)        | 3.641  | 3.901  | 65.75  | < 2 × 10 <sup>-16</sup> *** |
| s(CI.FGM)          | 3.442  | 3.828  | 45.24  | < 2 × 10 <sup>-16</sup> *** |
| s(SST.FGM)         | 3.679  | 3.940  | 37.75  | 7.44 × 10 <sup>-7</sup> *** |
| s(lat_utm,lon_utm) | 23.881 | 27.141 | 256.79 | < 2 × 10 <sup>-16</sup> *** |
| s(id)              | 36.793 | 40.000 | 548.61 | < 2 × 10 <sup>-16</sup> *** |

---  
Signif. codes: 0 '\*\*\*' 0.001 '\*\*' 0.01 '\*' 0.05 '.' 0.1 ' ' 1

R-sq.(adj) = 0.271 Deviance explained = 37.8%

-REML = -4433.9 Scale est. = 1 n = 4279



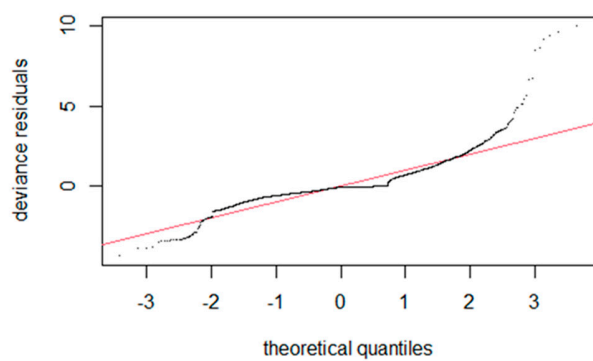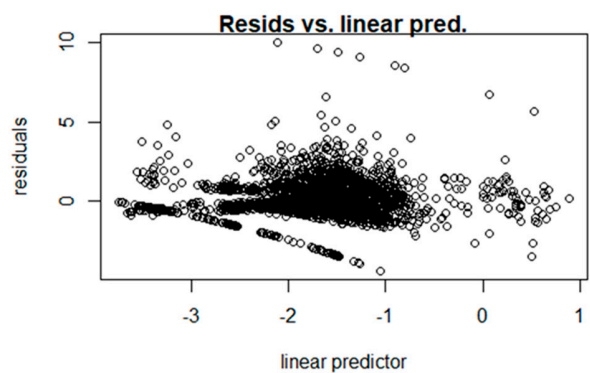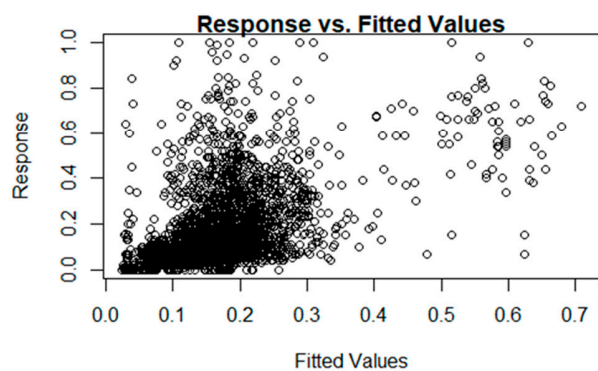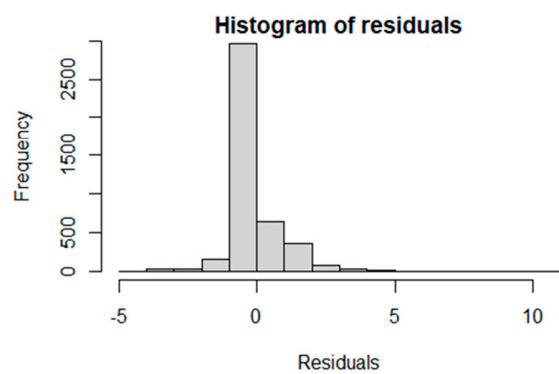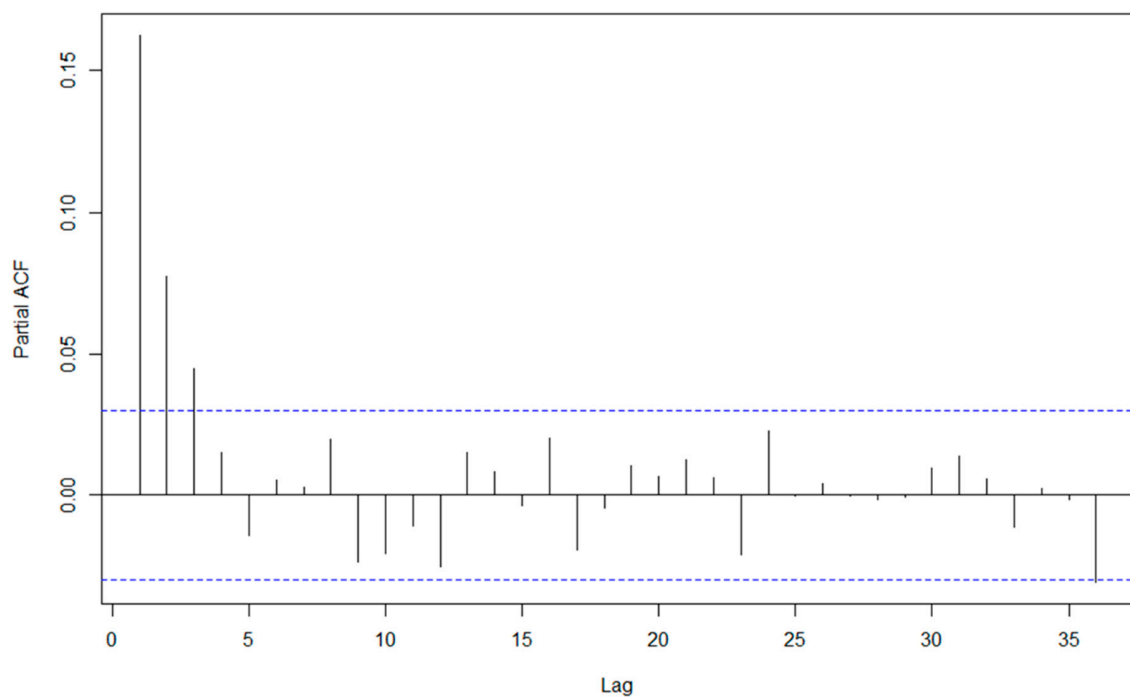



### Kemp's ridley turtles:

Family: Beta regression(3.365)

Link function: logit

Formula:

$\text{ptop2T} \sim \text{s}(\text{sst}, k = 5) + \text{s}(\text{logdepth}, k = 5) + \text{s}(\text{DIST\_shelf}, k = 5) + \text{s}(\text{lat\_utm}, \text{lon\_utm}) + \text{s}(\text{id}, \text{bs} = "re")$

Parametric coefficients:

|             | Estimate | Std. Error | z value | Pr(> z )                  |
|-------------|----------|------------|---------|---------------------------|
| (Intercept) | -1.1572  | 0.1008     | -11.48  | $< 2 \times 10^{-16}$ *** |

---

Signif. codes: 0 '\*\*\*' 0.001 '\*\*' 0.01 '\*' 0.05 '.' 0.1 ' ' 1

Approximate significance of smooth terms:

|                    | edf    | Ref.df | Chi.sq | p-value                   |
|--------------------|--------|--------|--------|---------------------------|
| s(sst)             | 3.769  | 3.963  | 52.14  | $< 2 \times 10^{-16}$ *** |
| s(logdepth)        | 3.094  | 3.514  | 76.76  | $< 2 \times 10^{-16}$ *** |
| s(DIST_shelf)      | 3.759  | 3.924  | 19.54  | 0.000373 ***              |
| s(lat_utm,lon_utm) | 18.934 | 22.938 | 71.61  | $5.62 \times 10^{-8}$ *** |
| s(id)              | 34.665 | 39.000 | 516.05 | $< 2 \times 10^{-16}$ *** |

---

Signif. codes: 0 '\*\*\*' 0.001 '\*\*' 0.01 '\*' 0.05 '.' 0.1 ' ' 1

R-sq.(adj) = 0.318 Deviance explained = 39.4%

-REML = -1706.9 Scale est. = 1 n = 2562

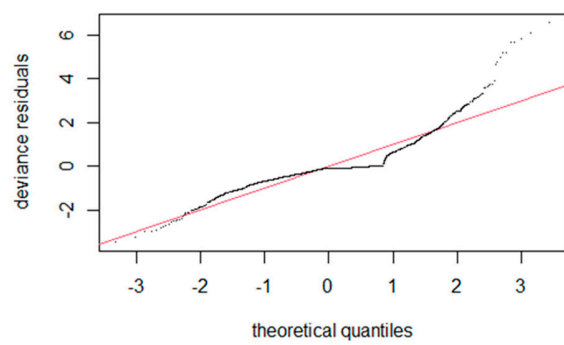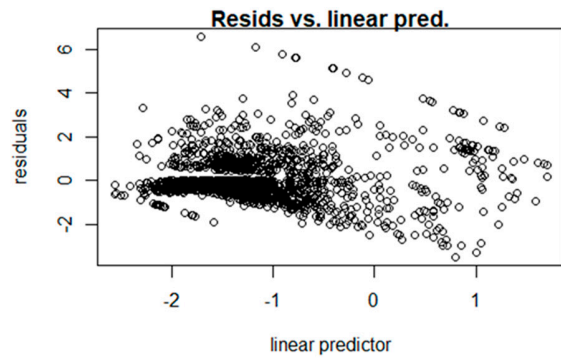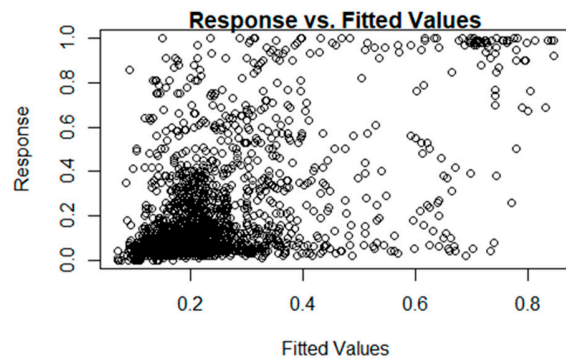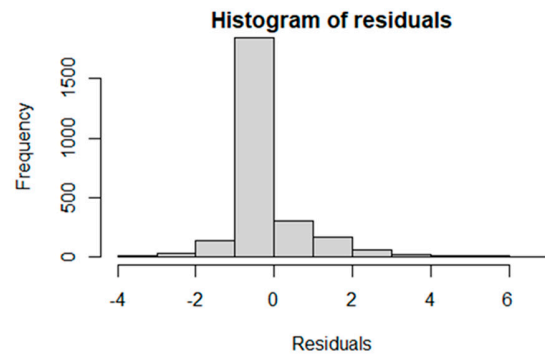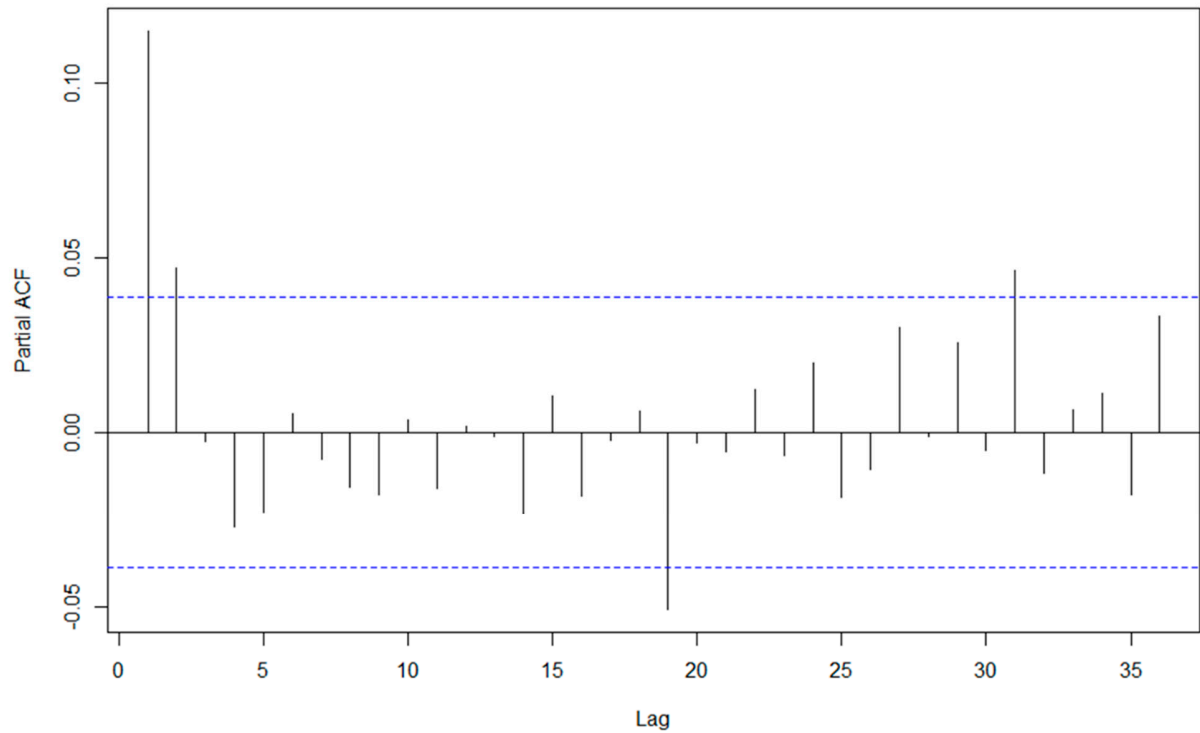

## Green turtles:

Family: Beta regression(8.53)

Link function: logit

Formula:

ptop2T ~ season + s(anom, k = 5) + s(logdepth, k = 5) + s(CI.FGM,  
k = 5) + s(SST.FGM, k = 5) + s(lat\_utm, lon\_utm) + s(id,  
bs = "re")

Parametric coefficients:

|              | Estimate  | Std. Error | z value | Pr(> z )     |
|--------------|-----------|------------|---------|--------------|
| (Intercept)  | -0.934669 | 0.459167   | -2.036  | 0.041793 *   |
| seasonSpring | 0.309743  | 0.085656   | 3.616   | 0.000299 *** |
| seasonSummer | -0.346015 | 0.123136   | -2.810  | 0.004954 **  |
| seasonWinter | -0.008118 | 0.074733   | -0.109  | 0.913495     |

Signif. codes: 0 '\*\*\*' 0.001 '\*\*' 0.01 '\*' 0.05 '.' 0.1 ' ' 1

Approximate significance of smooth terms:

|                    | edf    | Ref.df | Chi.sq  | p-value                   |
|--------------------|--------|--------|---------|---------------------------|
| s(anom)            | 3.740  | 3.959  | 27.328  | $1 \times 10^{-5}$ ***    |
| s(logdepth)        | 2.999  | 3.273  | 7.422   | 0.081634 .                |
| s(CI.FGM)          | 3.237  | 3.711  | 11.494  | 0.014141 *                |
| s(SST.FGM)         | 3.449  | 3.820  | 17.857  | 0.000656 ***              |
| s(lat_utm,lon_utm) | 22.130 | 25.931 | 138.767 | $< 2 \times 10^{-16}$ *** |
| s(id)              | 3.970  | 6.000  | 255.442 | $< 2 \times 10^{-16}$ *** |

---

Signif. codes: 0 '\*\*\*' 0.001 '\*\*' 0.01 '\*' 0.05 '.' 0.1 ' ' 1

R-sq.(adj) = 0.423 Deviance explained = 54.7%

-REML = -493.23 Scale est. = 1 n = 836

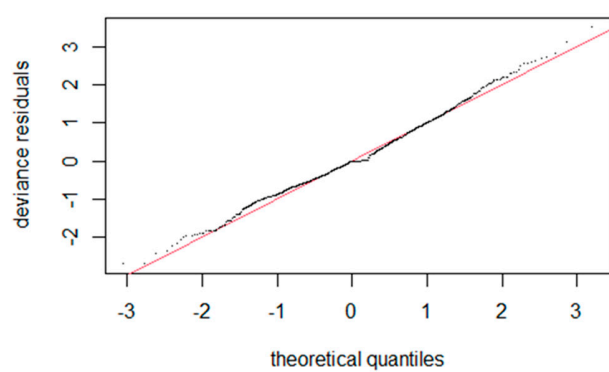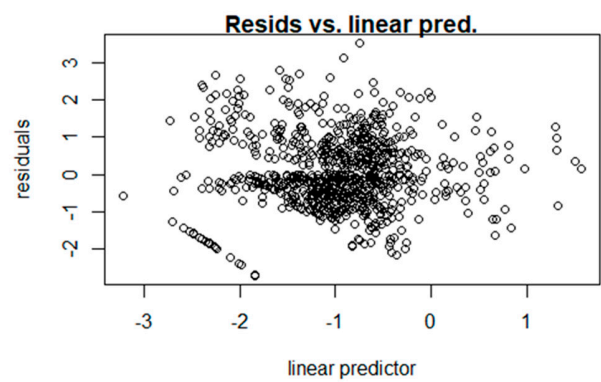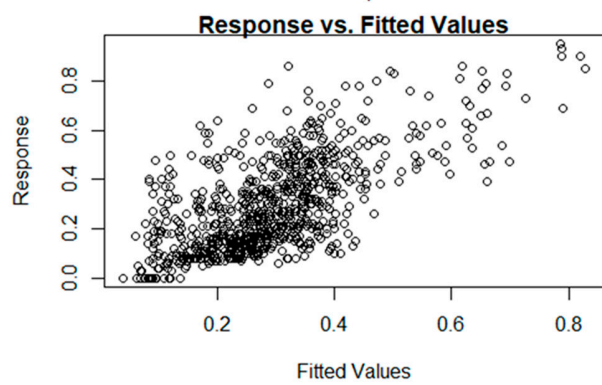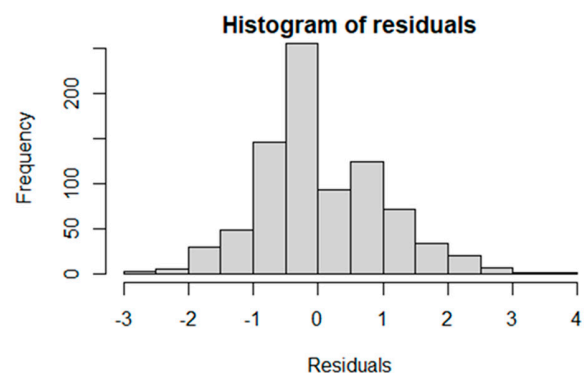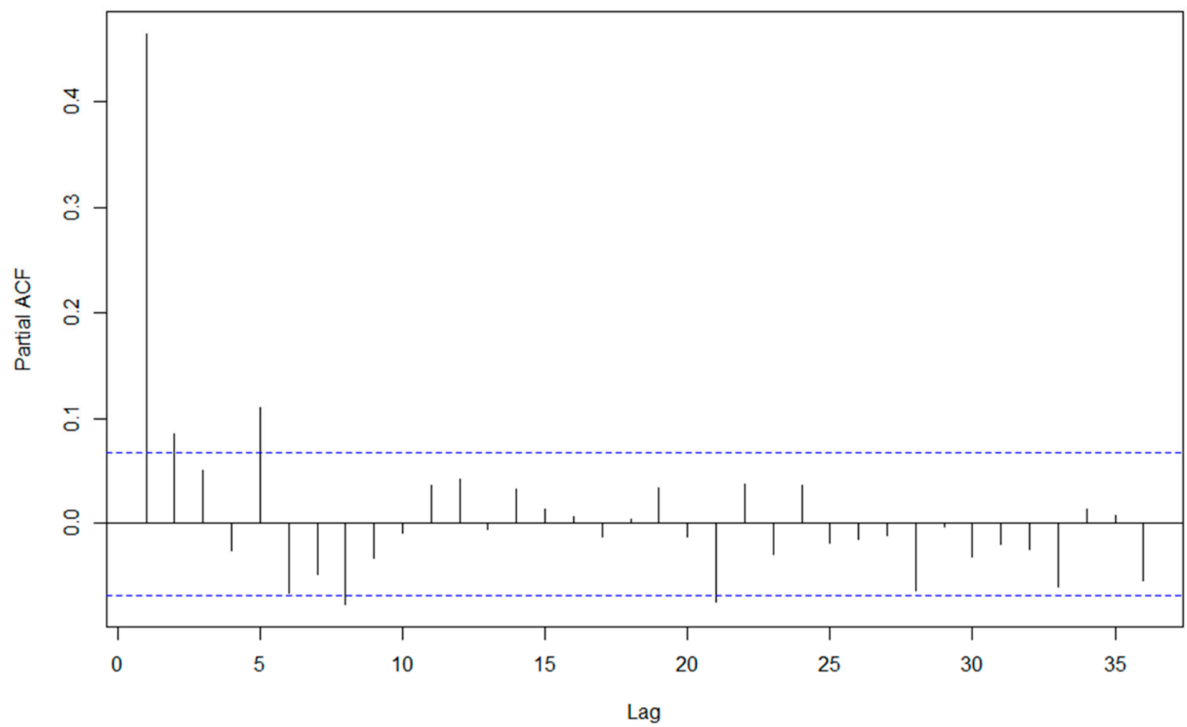

## SPLASH Tag Specifications

### Data Product: TAD Histogram

|                      |                                       |
|----------------------|---------------------------------------|
| Depth accuracy       | 1% of reading +/- 1m <sup>1</sup>     |
| Depth resolution     | 0.5m <sup>1</sup>                     |
| Depth units          | mH <sub>2</sub> O                     |
| Bins                 | 2-14 or 12                            |
| Bin limits           | 0 to 1700m <sup>1</sup>               |
| Type                 | Percent of summary period (frequency) |
| Frequency resolution | 1%                                    |

1. Standard range

all depth logging tags utilized in this analysis are standard range (as opposed to extended range);  
source: Wildlife Computers
